# Supplementary material for: A Polypeptide of Tumor-Associated Antigen L6 with Intrinsic Adjuvant Activity Enhances Antitumor Immunity
Source: MDPI journal article supplement (doi:10.3390/vaccines8040620), 2020-10-21
Supplement: s1 [file s1]

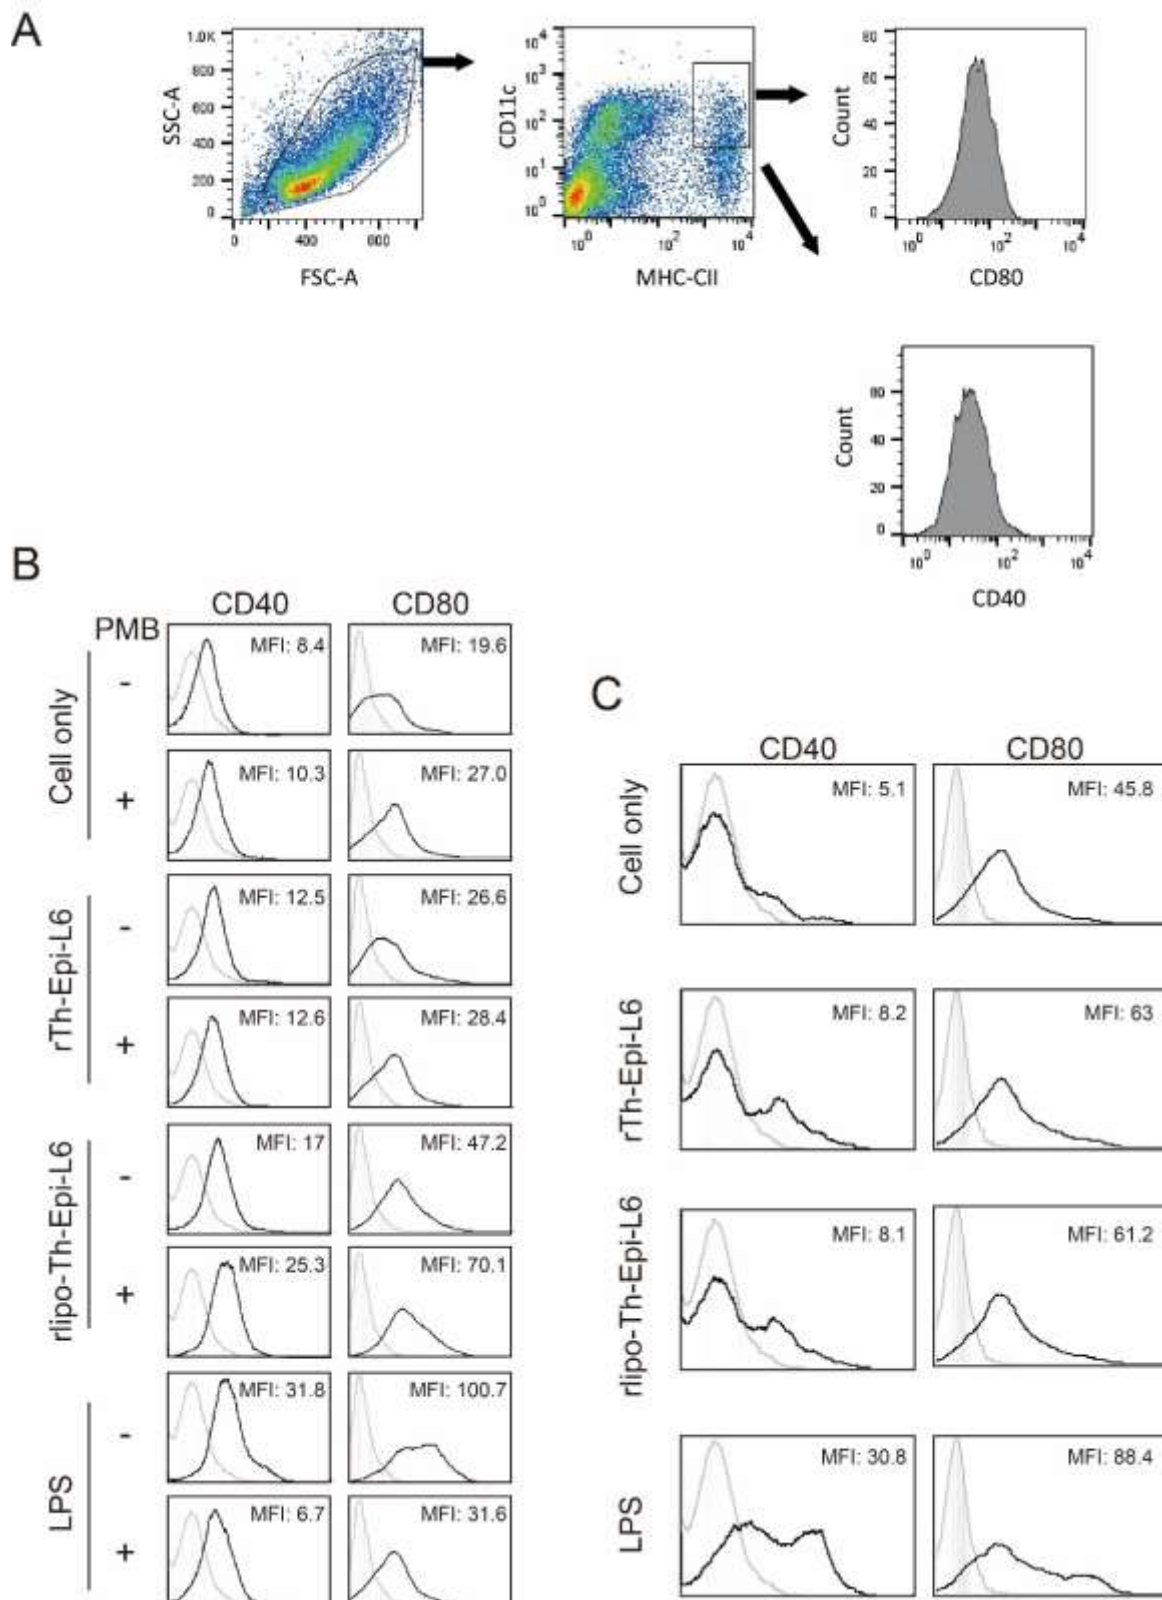

**Figure S1.** : Supplemental Figure 1, related to Figure 2. (A) The cultured bone marrow cells were collected and analyzed using flow cytometry. SSC vs FCS density plot was gated for anti-CD11c and anti-MHC class II analysis. The CD11c<sup>+</sup>/MHC II<sup>+</sup> cells were indicated as dendritic cells. (B)

Representative flow cytometry analysis for Figure 2A-B. (C) Representative flow cytometry analysis for Figure 2C-D.
